# Supplementary figures and images for: New Insights Into the Local Auxin Biosynthesis and Its Effects on the Rapid Growth of Moso Bamboo (Phyllostachys edulis)
Source: Frontiers journal article supplement (doi:10.3389/fpls.2022.858686), 2022-05-03

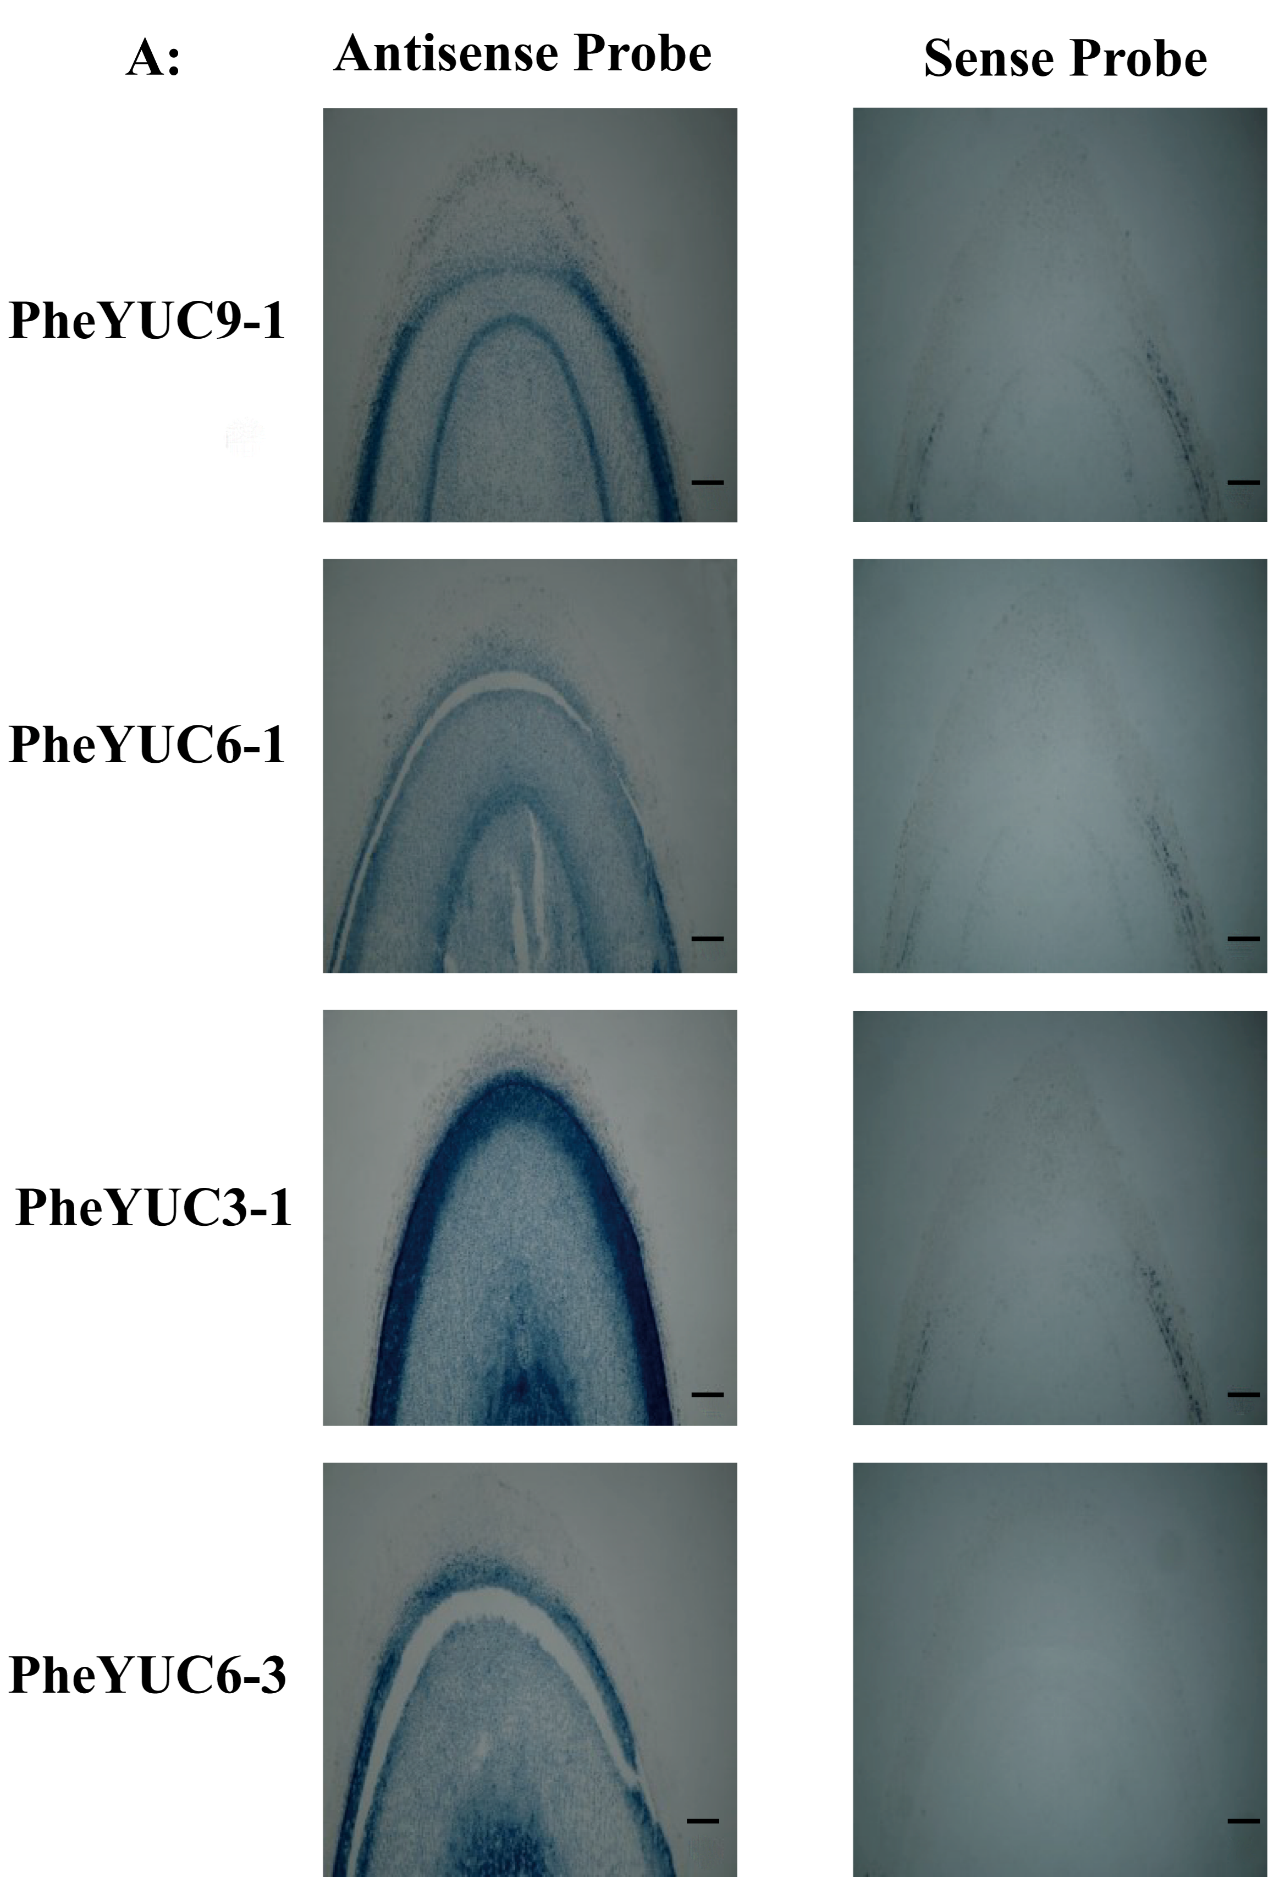


**
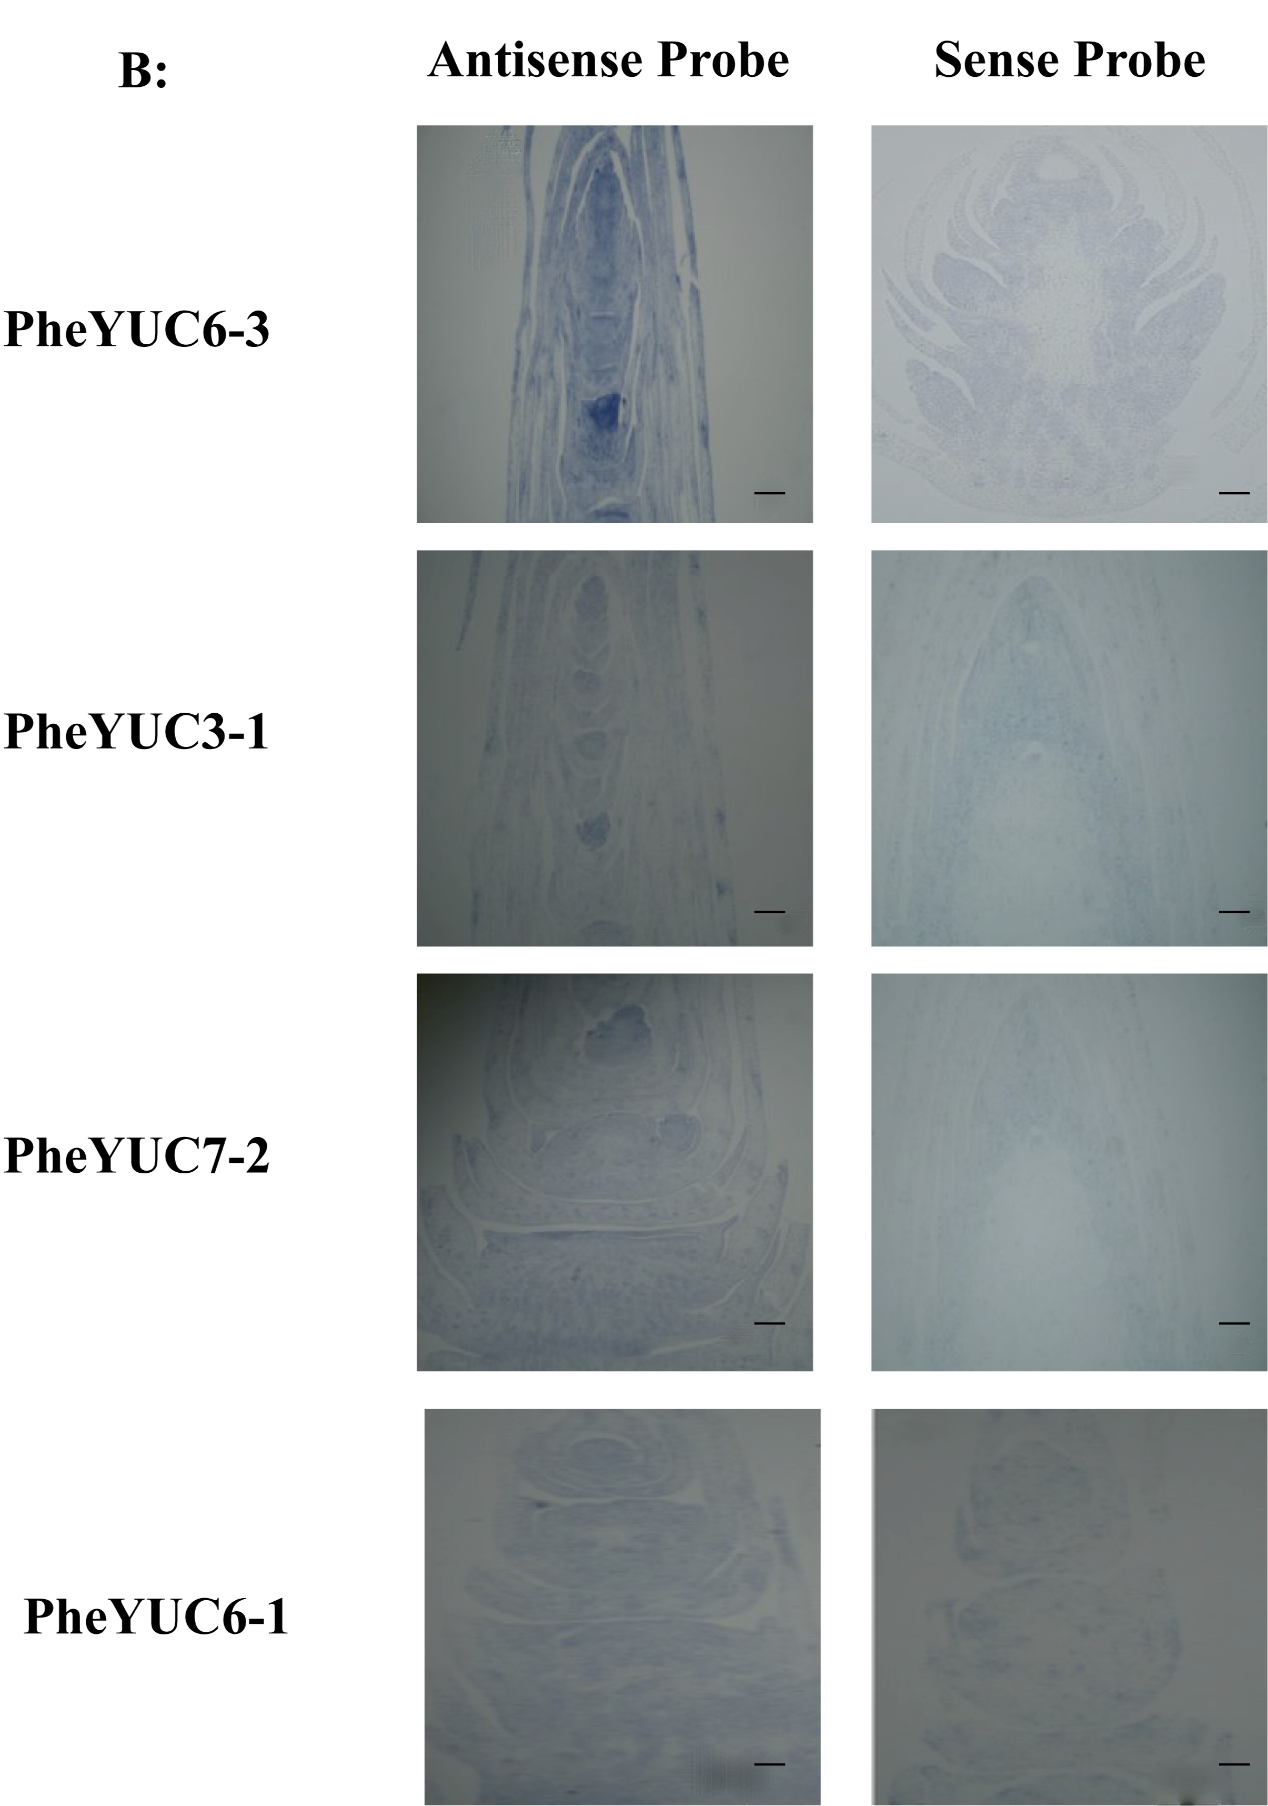
**


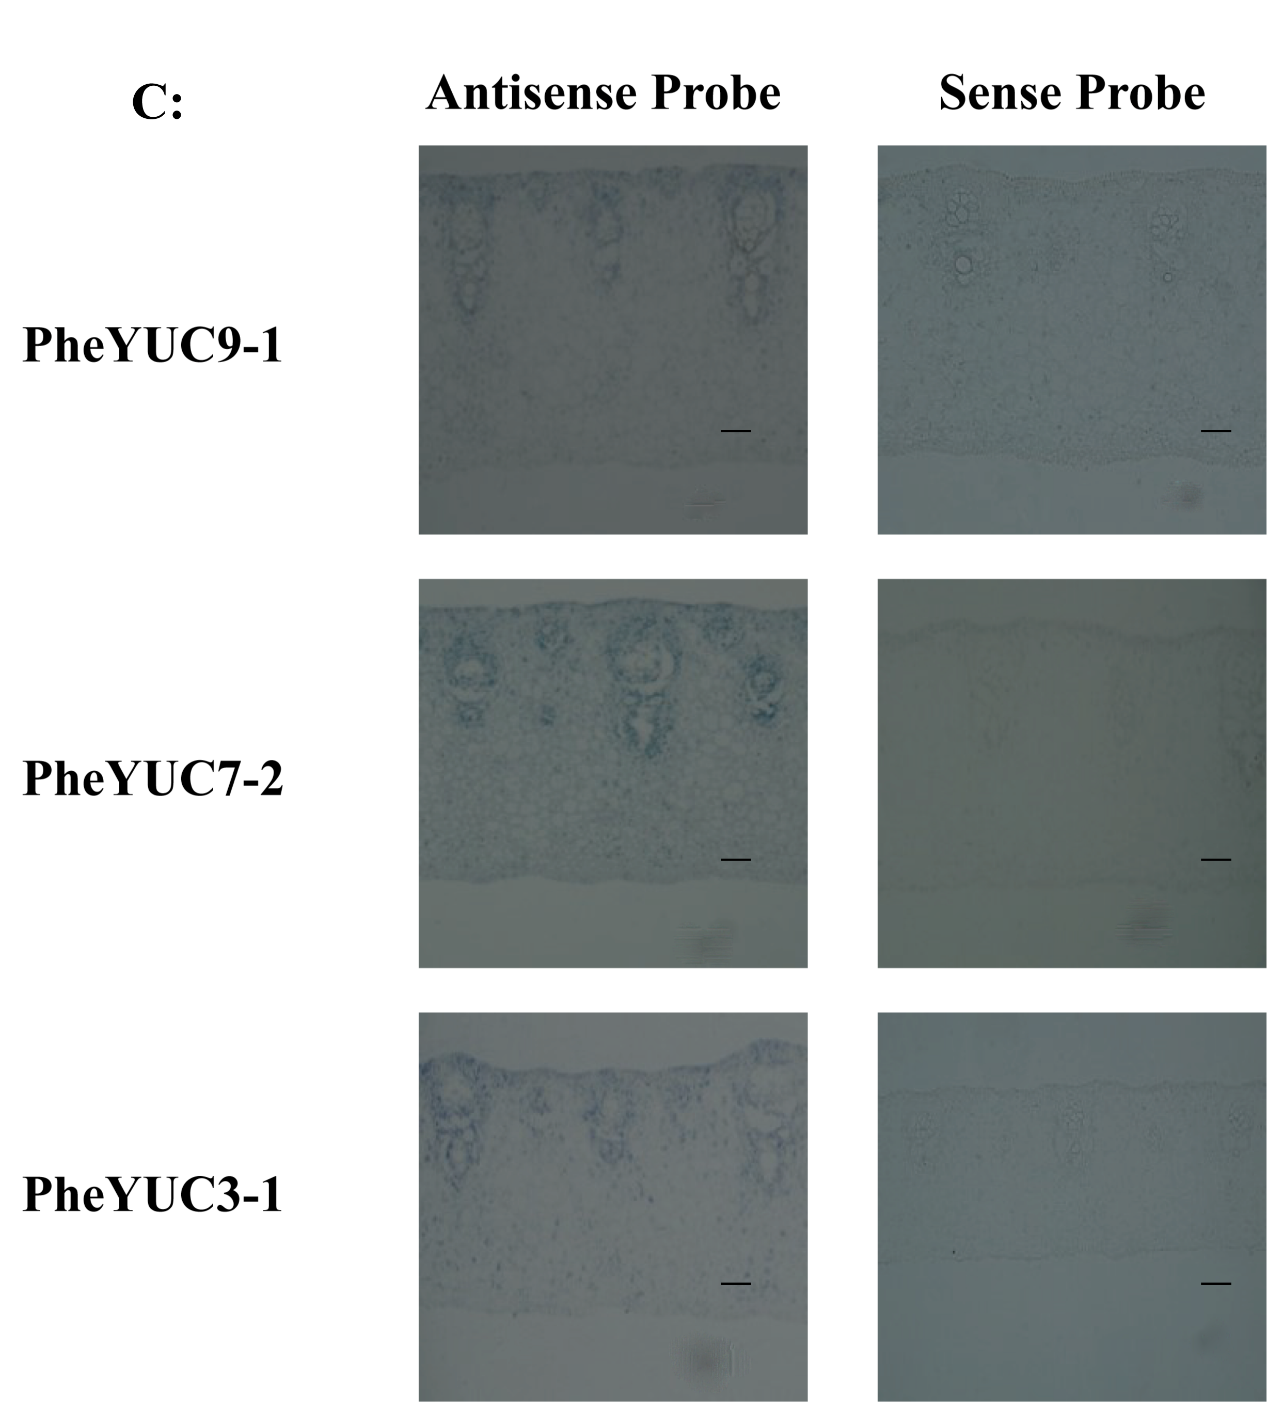


**Figure S3.** In situ expression of other key YUCCA genes. (A) root, (B) shoot tip, (C) young sheath. Bar = 50 μm

Supplement: Data_Sheet_1.ZIP [file Data_Sheet_1.ZIP]
